# Supplementary material
Source: Springer Nature journal article supplement (https://www.springermedizin.de/resource/supplementary/12875_2004_108_MOESM1_ESM.pdf/9436310)

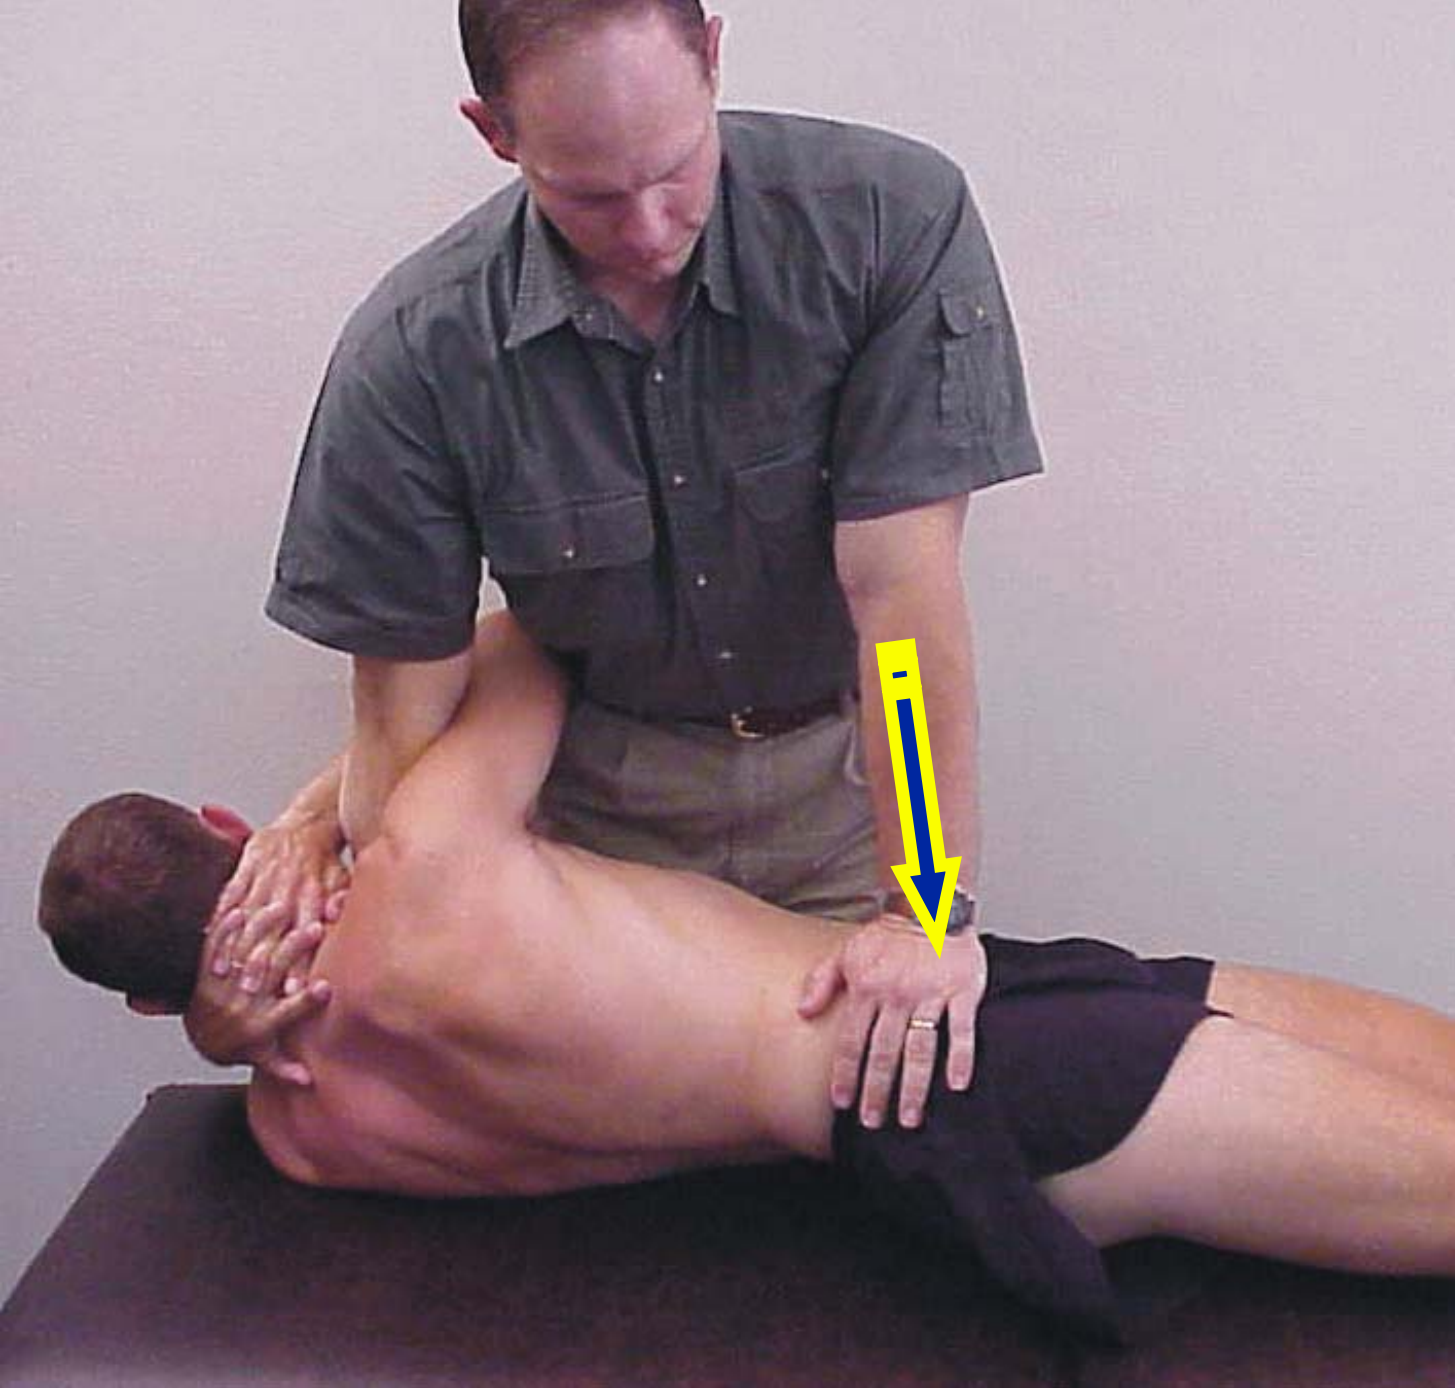

Supplement: MOESM1 [file 9436310]
